# Supplementary material for: Long non-coding RNA CRNDE promote the progression of tongue squamous cell carcinoma through regulating the PI3K/AKT/mTOR signaling pathway
Source: PubMed Central journal article supplement — RSC Adv. 2019 Jul 10;9(37):21381–90. doi: 10.1039/c9ra01321k (PMC9066183; doi:10.1039/c9ra01321k), 2019-07-10
Supplement: RA-009-C9RA01321K-s001.pdf [file RA-009-C9RA01321K-s001.pdf]

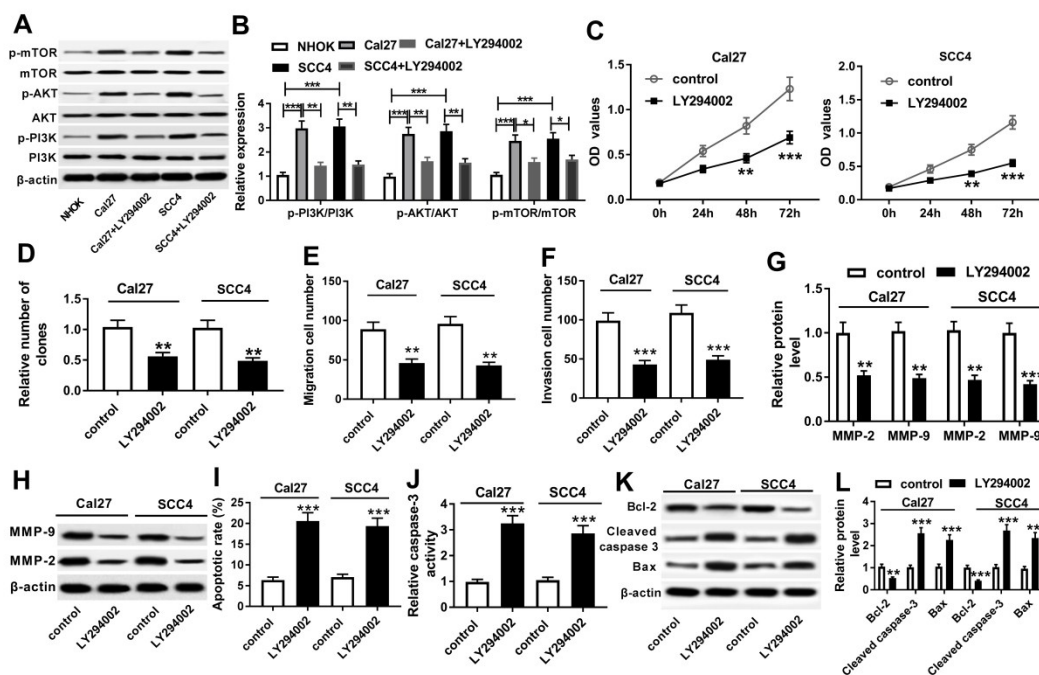

Supplement Figure 1. The effect of PI3K/AKT/mTOR pathway on TSCC was identified. Cal27 and SCC4 cells were treated with 10  $\mu$ M of LY294002, an inhibitor of PI3K/AKT/mTOR pathway, for 48 h. (A) and (B) Western blot of PI3K, mTOR, AKT, p-PI3K, p-mTOR and p-AKT expression levels in NHCK, Cal27, SCC4, LY294002 treated- Cal27 and SCC4 cells. CCK-8 assay for the proliferation (C), colony formation assay for cell colony formation (D), transwell assay for the migration (E) and invasion (F), western blot for MMP-9 and MMP-2 levels (G) and (H), flow cytometric analysis of cell apoptosis (I), caspase-3 activity assay of caspase-3 activity (J), western blot of Bcl-2, Cleaved caspase-3 and Bax levels (K) and (L) in LY294002- or DMSO- treated Cal27 and SCC4 cells. \* $P < 0.05$  or \*\* $P < 0.01$  or \*\*\* $P < 0.001$ .
